# Supplementary material for: Pretreatment Tissue TCR Repertoire Evenness Is Associated with Complete Pathologic Response in Patients with NSCLC Receiving Neoadjuvant Chemoimmunotherapy
Source: PubMed Central journal article supplement — Clin Cancer Res. 2021 Aug 10;27(21):5878–90. doi: 10.1158/1078-0432.CCR-21-1200 (PMC9401519; doi:10.1158/1078-0432.ccr-21-1200), 2021-08-10
Supplement: 10780432ccr211200-sup-263276_2_supp_7235171_qvf7n1.pdf [file 10780432ccr211200-sup-263276_2_supp_7235171_qvf7n1.pdf]

## Supplementary Figure S1:

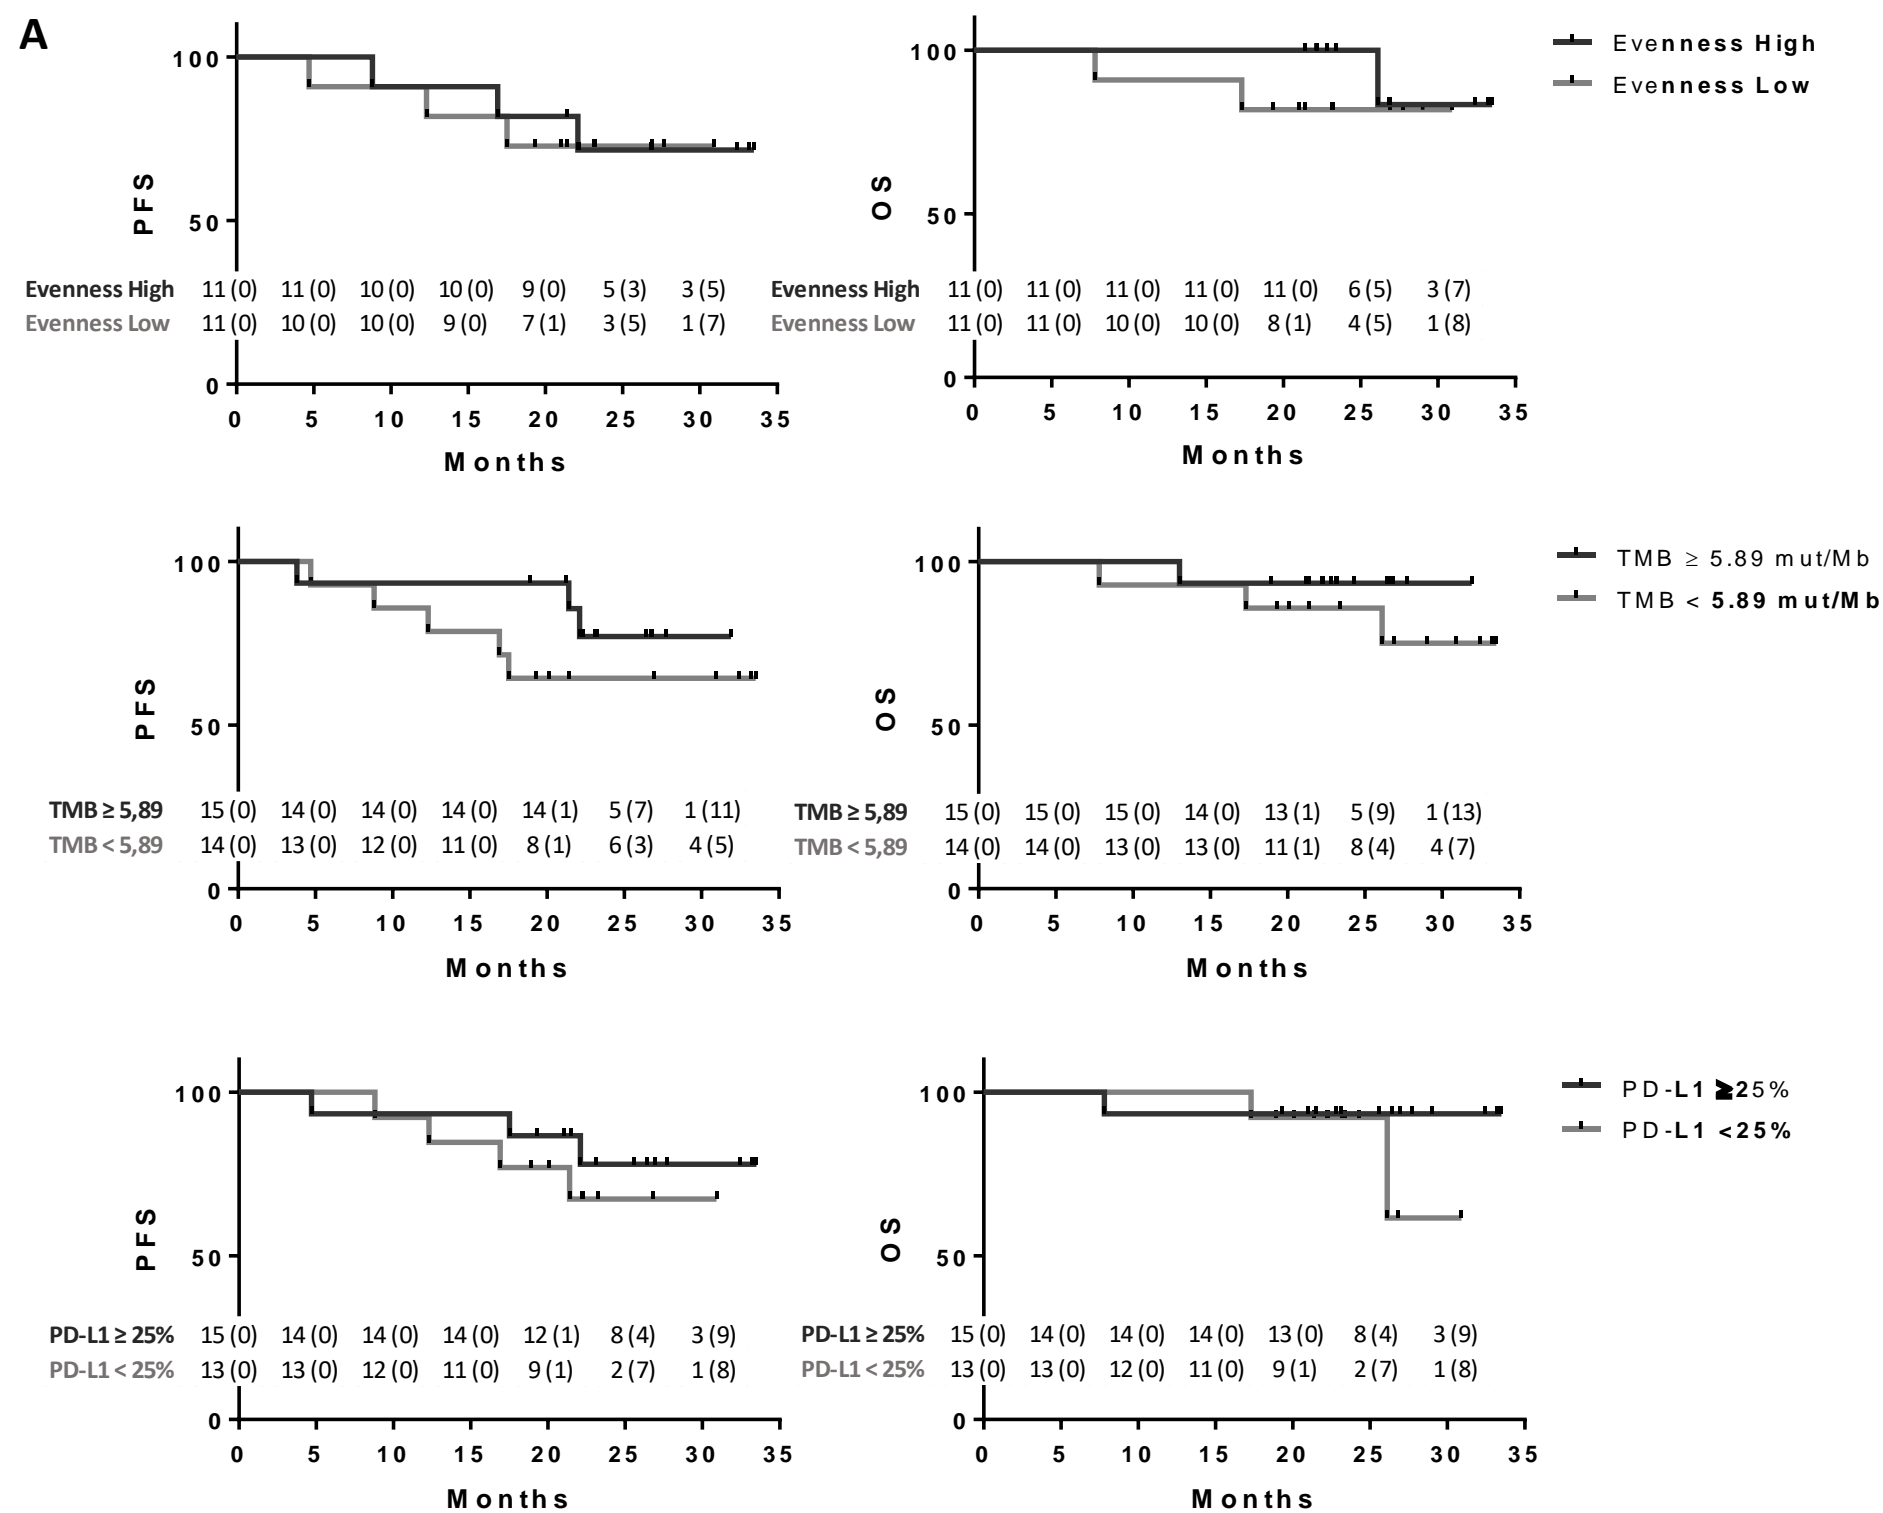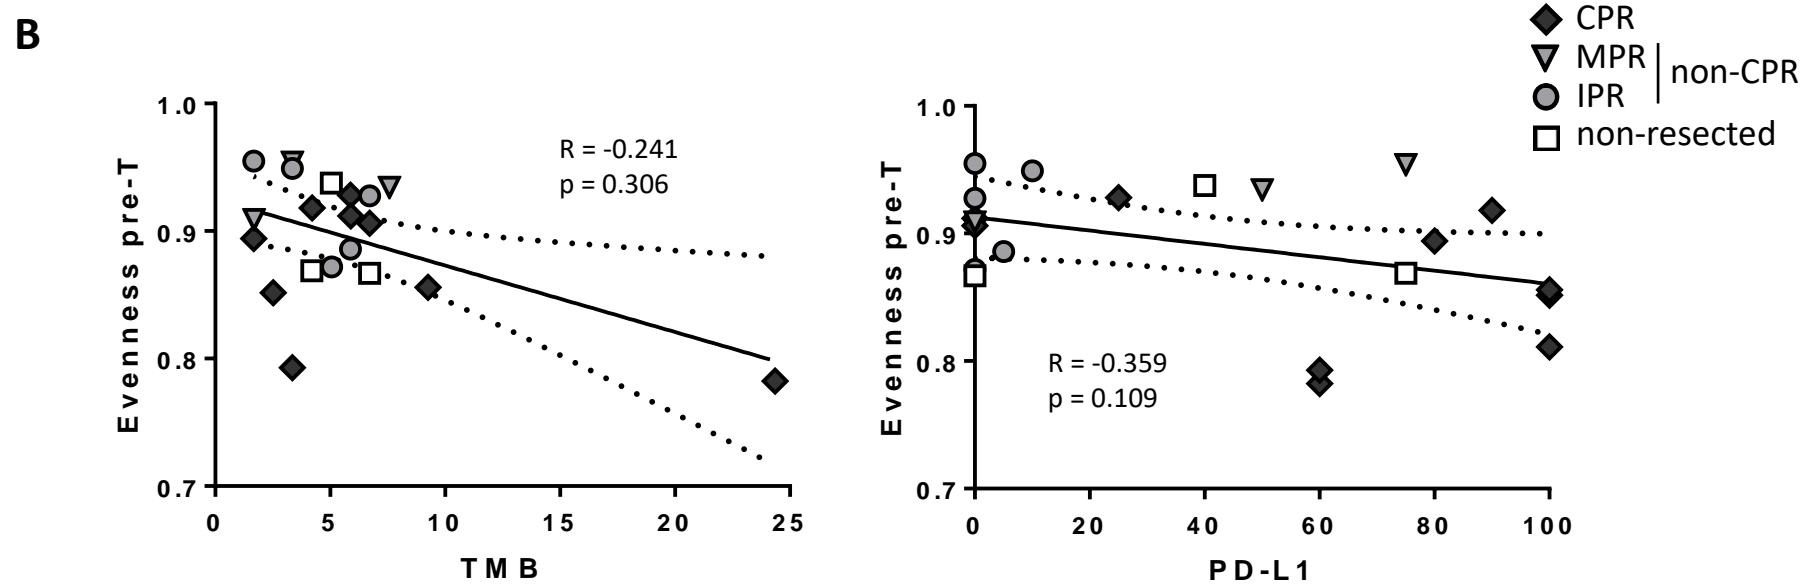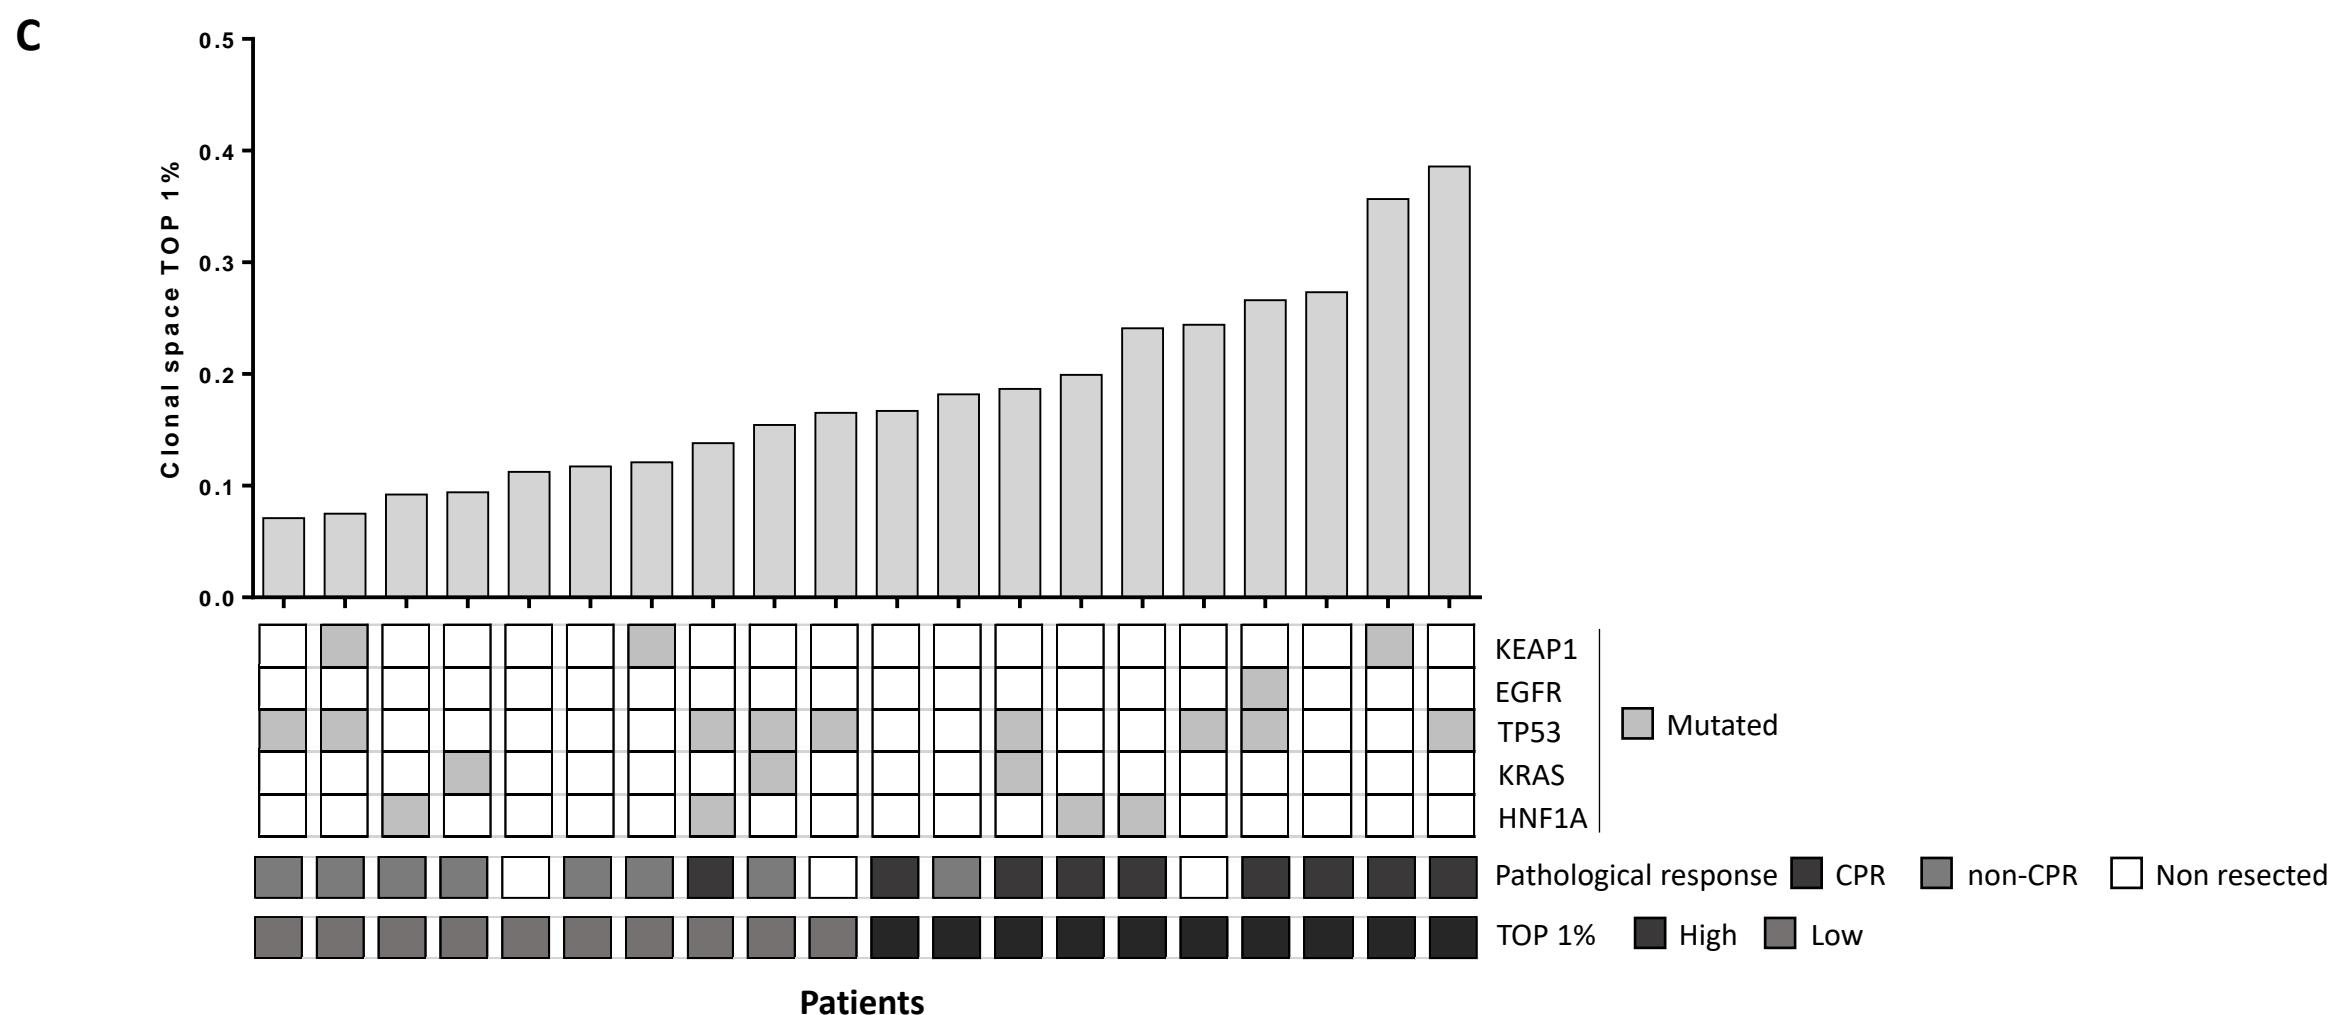

**Supplementary Figure S1. A.** PFS and OS percent survival stratified by pre-treatment evenness high and low patients (n=22), TMB (n=29) and PD-L1 (n=28). **B.** Correlation between evenness in pre-T tissue samples and TMB or PD-L1 (Evenness vs TMB: n=20; CPR, n=9; non-CPR, n=8; non-resected, n=3. Evenness vs PD-L1: n=21; CPR, n=10; non-CPR, n=8; non-resected, n=3). The black line indicates the linear regression line, and the dotted lines indicate the upper and lower boundaries of the 95% confidence interval. Each patient is represented by a green (CPR), purple (non-CPR) or grey (non-resected) dot. **C.** Characterization of the entire TCR-sequenced cohort based on their top 1% clonal space in pre-T tissue, mutations and pathological response (n=22).
