# Supplementary material for: Pretreatment Tissue TCR Repertoire Evenness Is Associated with Complete Pathologic Response in Patients with NSCLC Receiving Neoadjuvant Chemoimmunotherapy
Source: PubMed Central journal article supplement — Clin Cancer Res. 2021 Aug 10;27(21):5878–90. doi: 10.1158/1078-0432.CCR-21-1200 (PMC9401519; doi:10.1158/1078-0432.ccr-21-1200), 2021-08-10
Supplement: 10780432ccr211200-sup-263276_2_supp_7235172_qvg7n2.pdf [file 10780432ccr211200-sup-263276_2_supp_7235172_qvg7n2.pdf]

## Supplementary Figure S2:

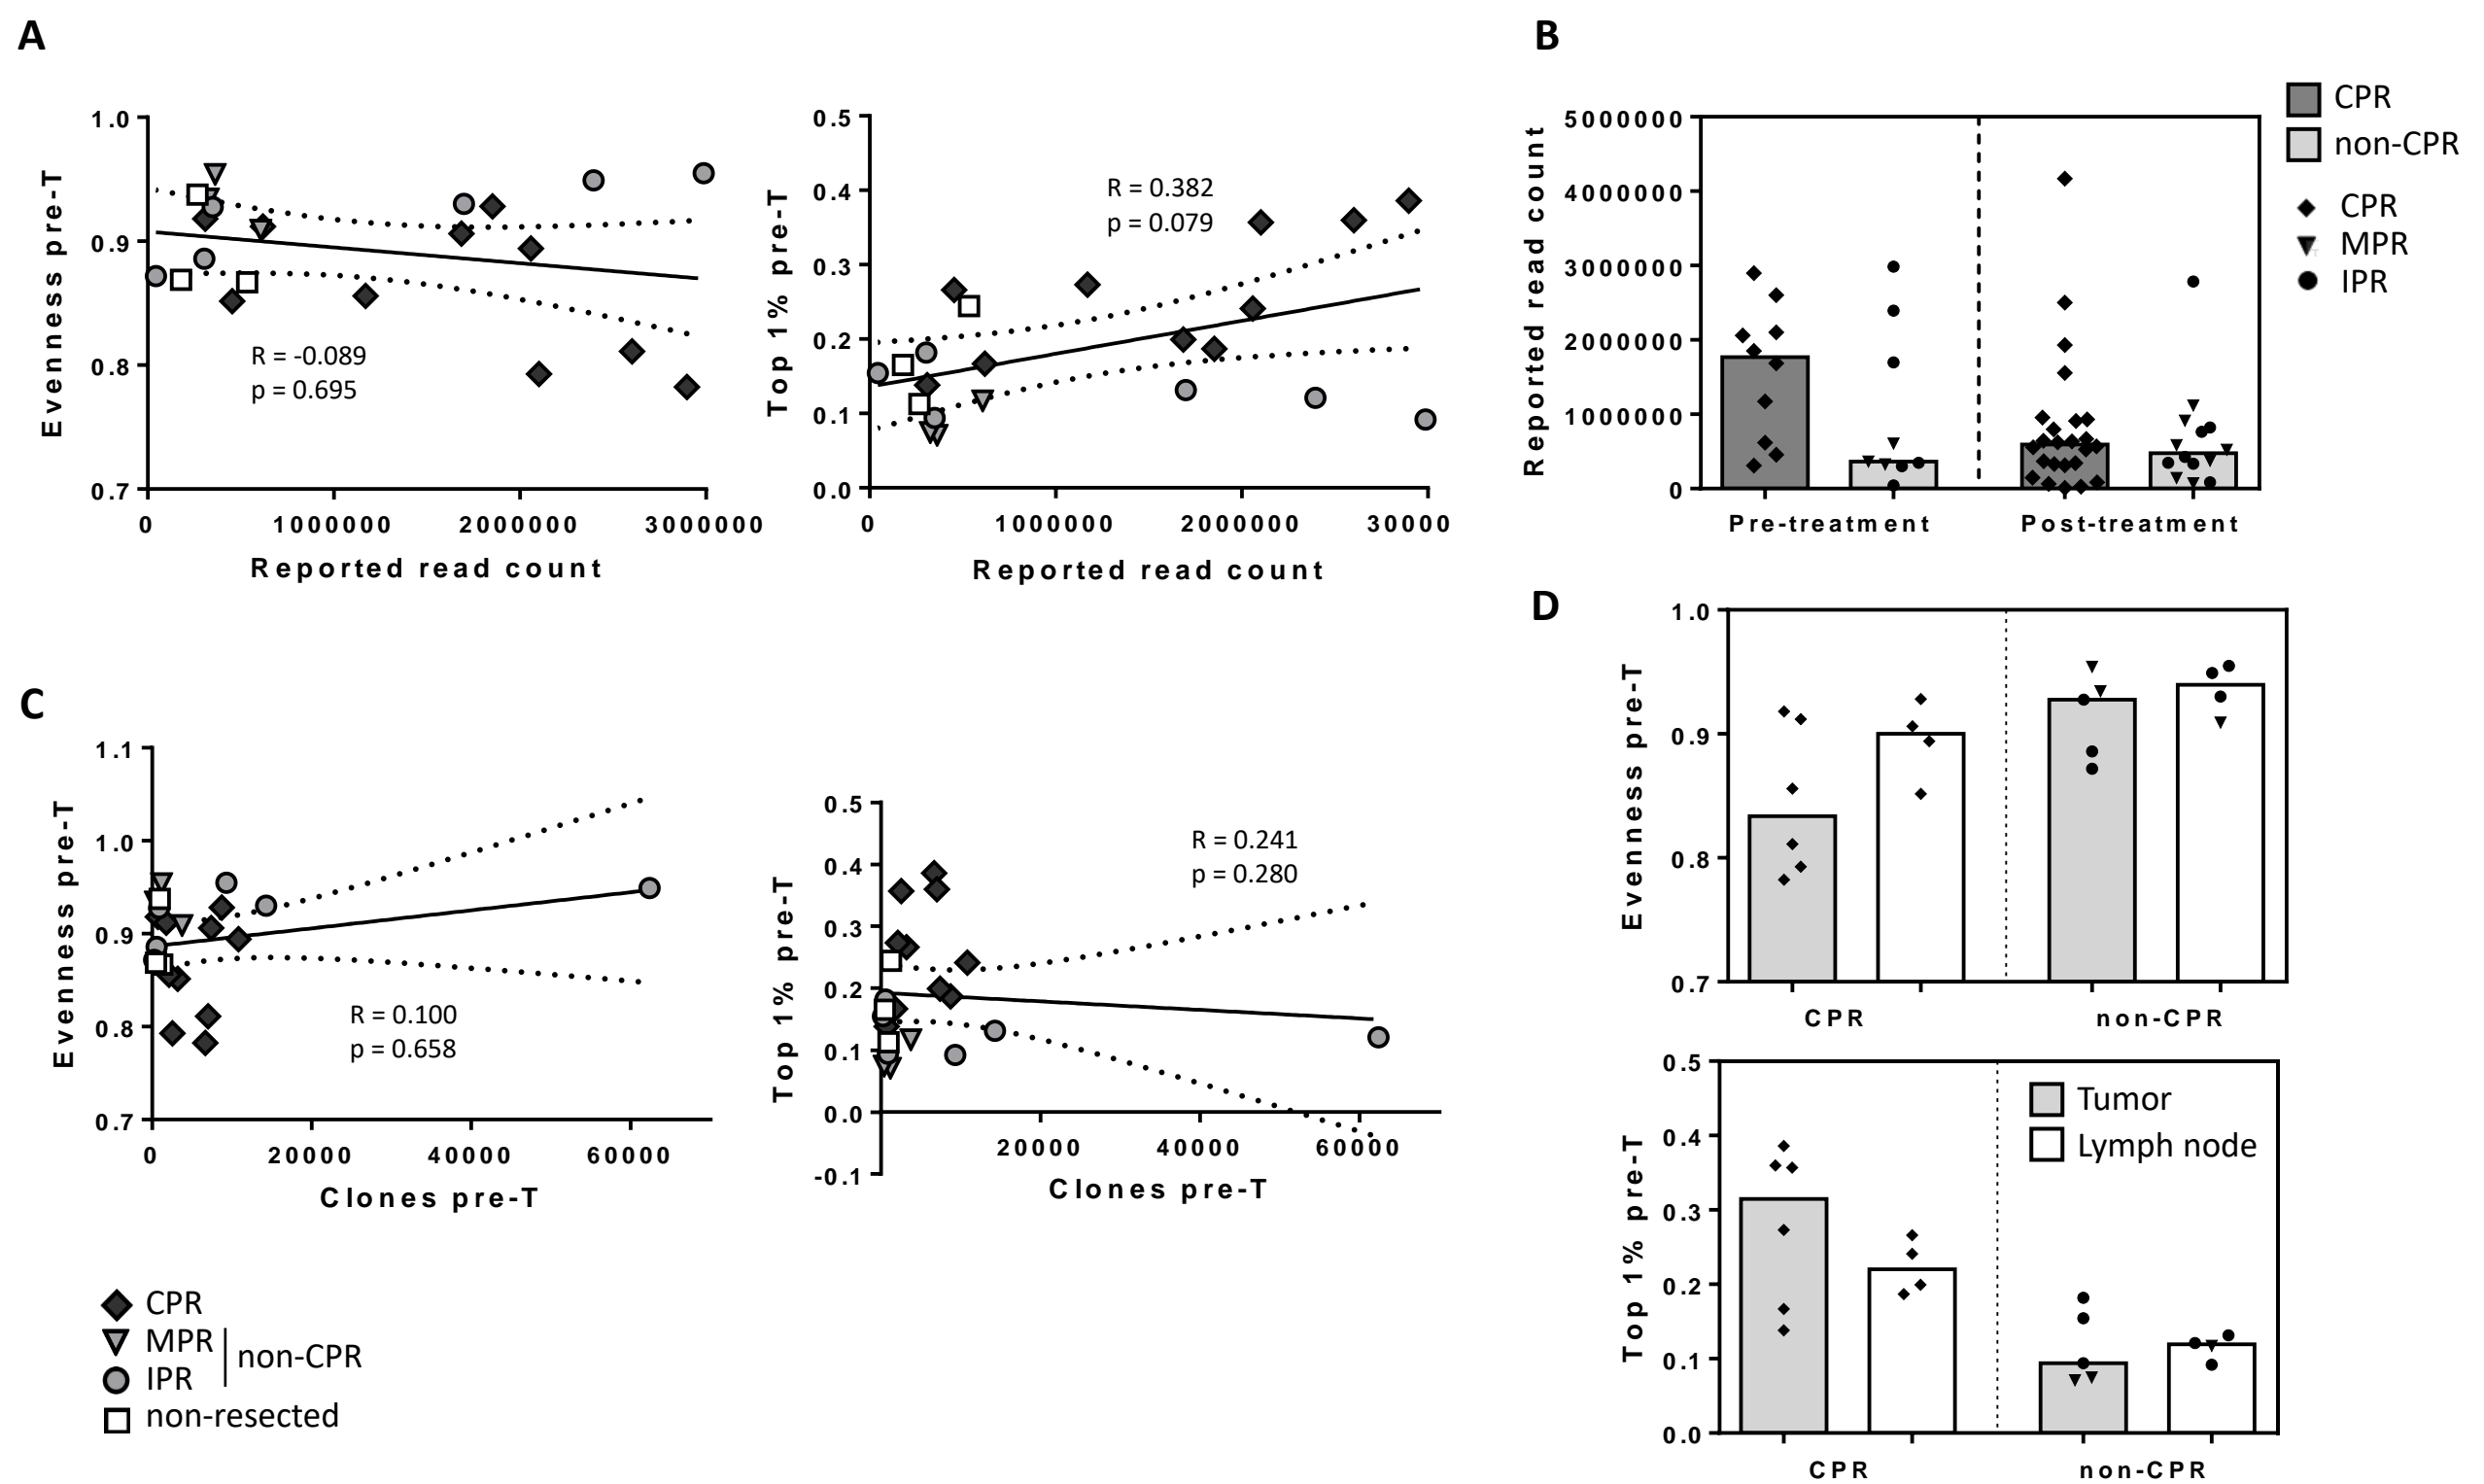

**Supplementary Figure S2.** **A.** Correlation between evenness and clonal space of the top 1% and reported read count in pre-treatment tissue (n=22). **B.** Reported read counts in pre- and post-treatment tissue samples between CPR and non-CPR patients. Pre-T CPR patients, n=10; pre-T non-CPR patients, n=9; post-T CPR patients, n=24; post-T non-CPR patients, n=14. **C.** Correlation between evenness and clonal space of the top 1% and clones detected in pre-treatment tissue (n=19). **D.** Pre-treatment evenness and top 1% stratified by biopsy origin: tumor or lymph node. Comparisons between tumor and lymph node samples are shown (n=19; tumor, n=11; lymph node, n=8). ns= not significant,  $P < 0.025$  was considered statistically significant after Bonferroni's correction for multiple tests.
