# Supplementary material for: Pretreatment Tissue TCR Repertoire Evenness Is Associated with Complete Pathologic Response in Patients with NSCLC Receiving Neoadjuvant Chemoimmunotherapy
Source: PubMed Central journal article supplement — Clin Cancer Res. 2021 Aug 10;27(21):5878–90. doi: 10.1158/1078-0432.CCR-21-1200 (PMC9401519; doi:10.1158/1078-0432.ccr-21-1200), 2021-08-10
Supplement: 10780432ccr211200-sup-263276_2_supp_7235173_qvp7n2.pdf [file 10780432ccr211200-sup-263276_2_supp_7235173_qvp7n2.pdf]

### Supplementary Figure S3:

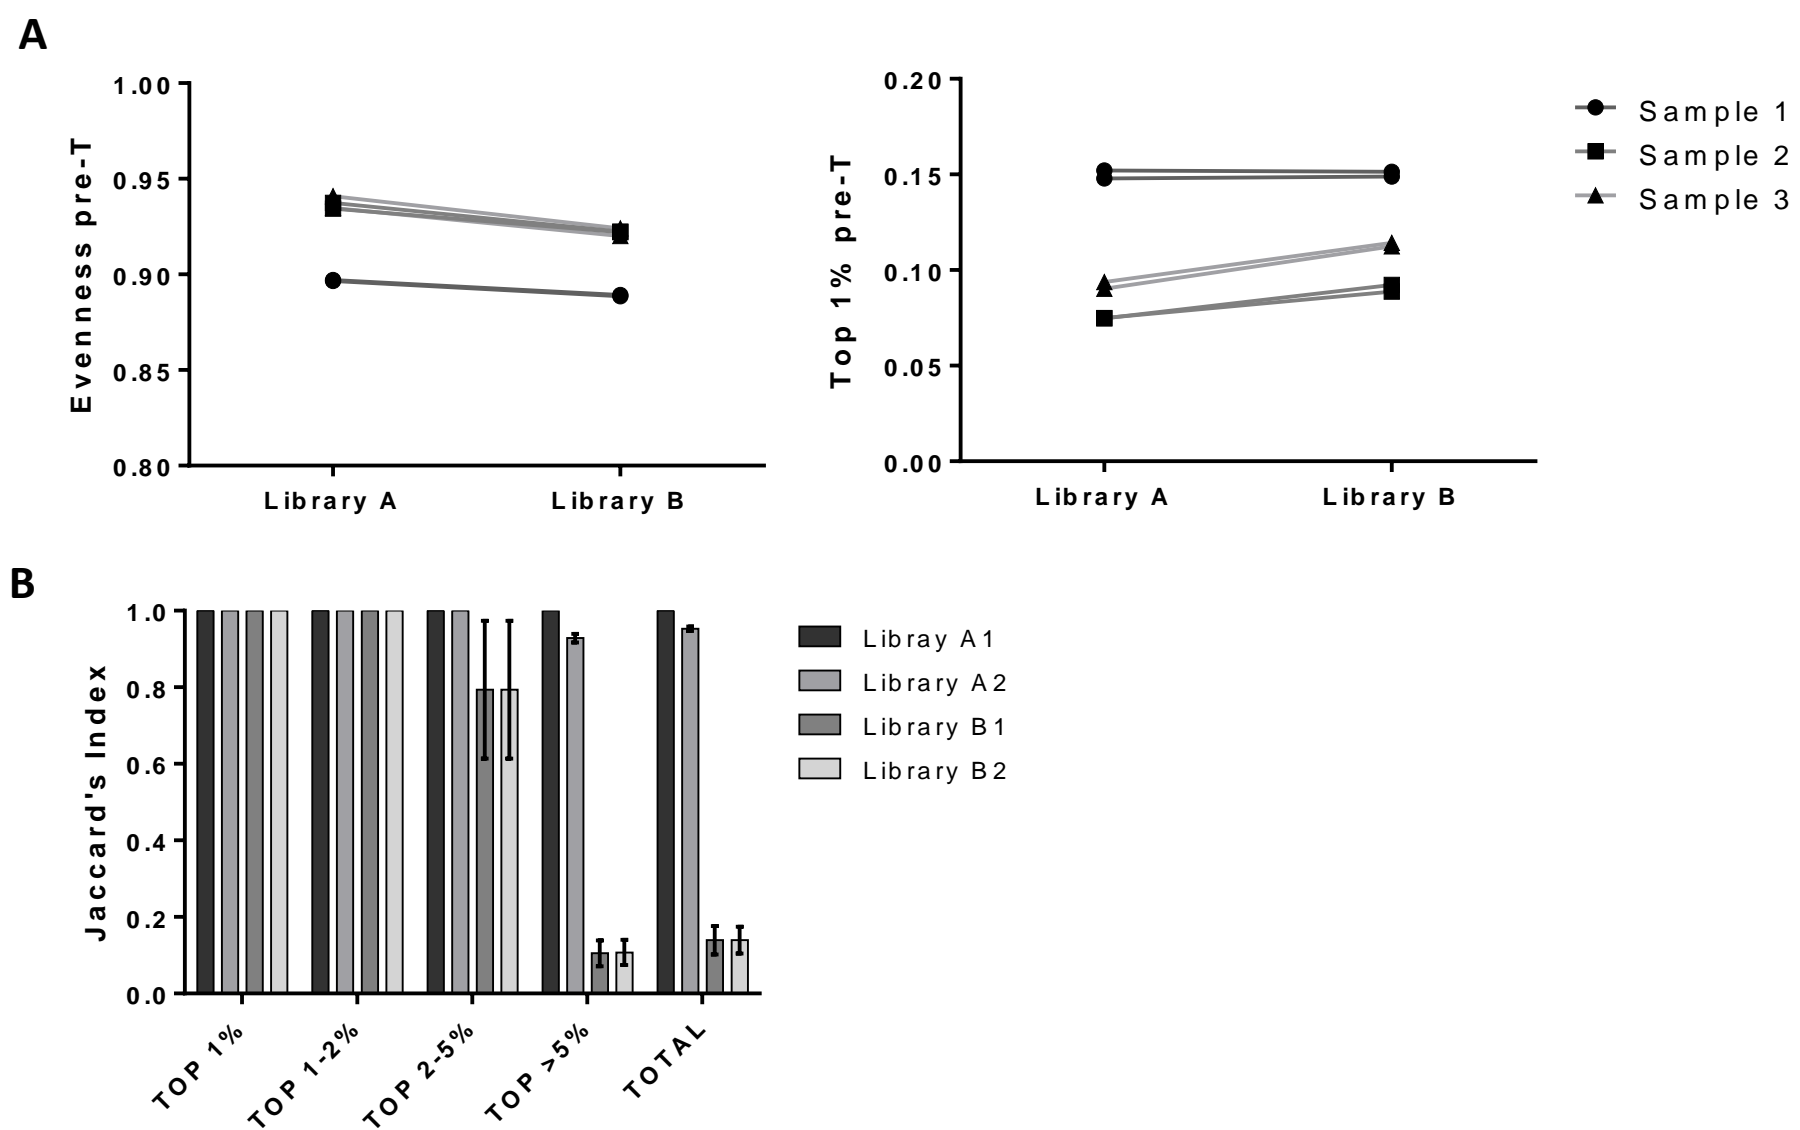

**Supplementary Figure S3. A.** Stability of evenness and top 1% across technical replicates. **B.** Clonal reproducibility in frequency ranks between sequencing replicates or libraries.
