# Supplementary material for: Pretreatment Tissue TCR Repertoire Evenness Is Associated with Complete Pathologic Response in Patients with NSCLC Receiving Neoadjuvant Chemoimmunotherapy
Source: PubMed Central journal article supplement — Clin Cancer Res. 2021 Aug 10;27(21):5878–90. doi: 10.1158/1078-0432.CCR-21-1200 (PMC9401519; doi:10.1158/1078-0432.ccr-21-1200), 2021-08-10
Supplement: 10780432ccr211200-sup-263276_2_supp_7235175_qvs7n2.pdf [file 10780432ccr211200-sup-263276_2_supp_7235175_qvs7n2.pdf]

**Supplementary Figure S4:**

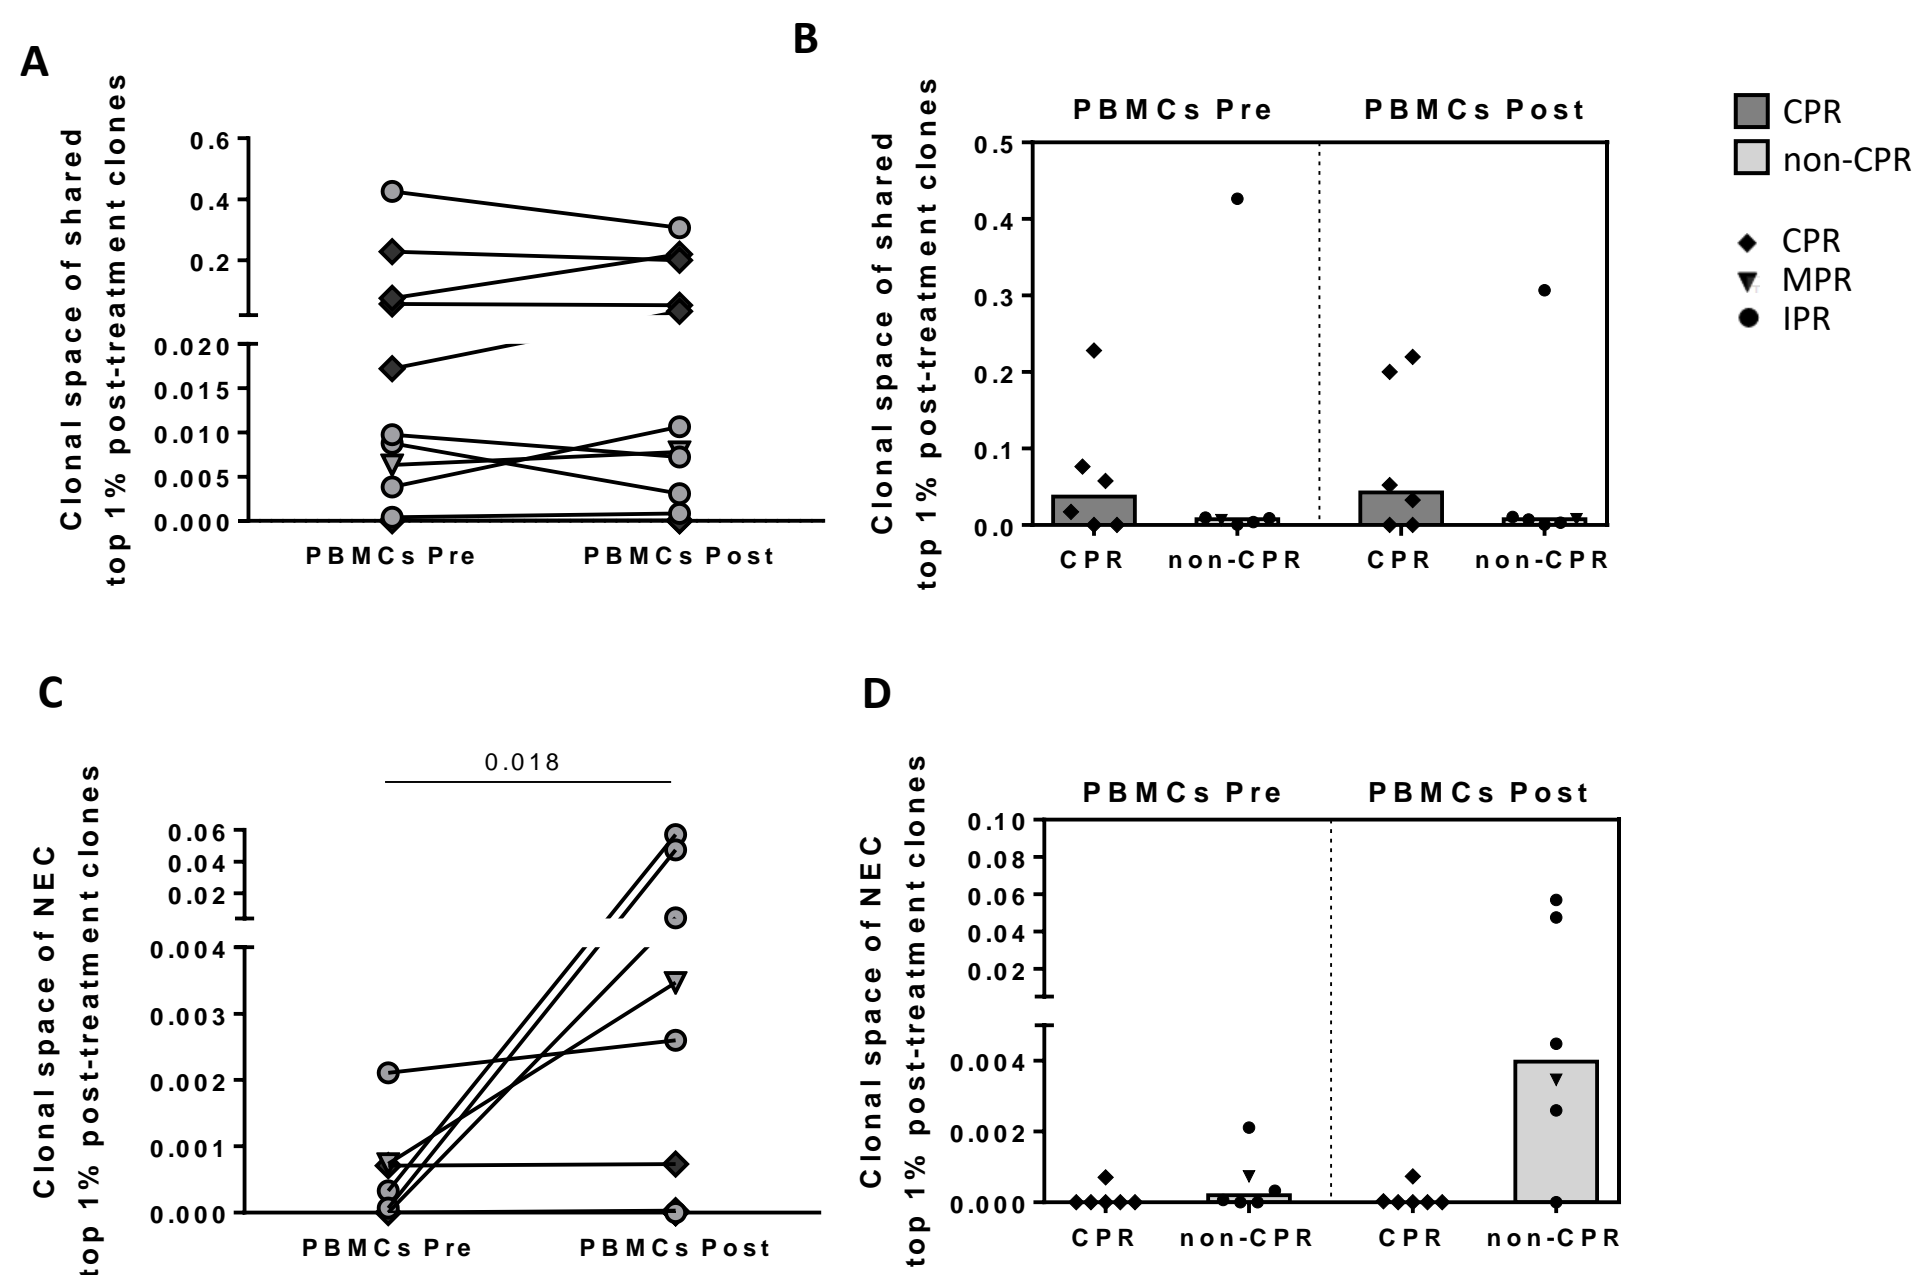

**Supplementary Figure S4.** **A.** Clonal space occupied by shared top 1% post-T clones in PBMCs at pre- and post-treatment timepoints (n=12). **B.** Clonal space occupied by shared top 1% post-T clones in PBMCs at pre- and post-treatment timepoints stratified by response (n=12; CPR, n=6; non-CPR, n=6). **C.** Clonal space occupied by NEC top 1% post-T clones in PBMCs at pre- and post-treatment timepoints (n=12). **D.** Clonal space occupied by NEC top 1% post-T clones in PBMCs at pre- and post-treatment timepoints stratified by response (n=12; CPR, n=6; non-CPR, n=6). ns= not significant,  $P < 0.0125$  was considered statistically significant after Bonferroni's correction for multiple tests
